# Supplementary material
Source: publisher figshare collection journal article supplement (https://tandf.figshare.com/ndownloader/files/17515649)
Supplement: Supplementary file 1 [file 17515649]

## Supplement 1

## ADRs by initial treatment status with suvorexant

|                                                 | Initial status of suvorexant treatment |           |           |          |
|-------------------------------------------------|----------------------------------------|-----------|-----------|----------|
|                                                 | Group N                                | Group S   | Group A   | Group O  |
| Number of patients                              | 1946                                   | 703       | 536       | 63       |
| Number of patients with adverse drug reactions  | 132                                    | 110       | 68        | 5        |
| Number of adverse drug reaction events          | 157                                    | 137       | 76        | 7        |
| Rate of occurrence                              | 6.78%                                  | 15.65%    | 12.69%    | 7.94%    |
| Type of adverse drug reactions N (%)            |                                        |           |           |          |
| Mental disorder                                 | 26 (1.34)                              | 49 (6.97) | 24 (4.48) | 1 (1.59) |
| Abnormal dreams                                 | 1 (0.05)                               | 2 (0.28)  | 3 (0.56)  | 1 (1.59) |
| Agitation                                       | 1 (0.05)                               | -         | -         | -        |
| Delirium                                        | -                                      | -         | 2 (0.37)  | -        |
| Depression                                      | 1 (0.05)                               | -         | -         | -        |
| Disorientation                                  | -                                      | 1 (0.14)  | -         | -        |
| Dissociative disorder                           | -                                      | -         | 1 (0.19)  | -        |
| Hallucination                                   | 1 (0.05)                               | -         | -         | -        |
| Hallucination, visual                           | 1 (0.05)                               | 1 (0.14)  | -         | -        |
| Hypnagogic hallucination                        | 1 (0.05)                               | -         | -         | -        |
| Initial insomnia                                | 2 (0.10)                               | 5 (0.71)  | 2 (0.37)  | -        |
| Insomnia                                        | 6 (0.31)                               | 30 (4.27) | 4 (0.75)  | -        |
| Irritability                                    | 1 (0.05)                               | -         | -         | -        |
| Middle insomnia                                 | 1 (0.05)                               | 3 (0.43)  | 2 (0.37)  | -        |
| Nervousness                                     | -                                      | 1 (0.14)  | -         | -        |
| Nightmare                                       | 11 (0.57)                              | 8 (1.14)  | 8 (1.49)  | -        |
| REM sleep abnormality                           | -                                      | -         | 1 (0.19)  | -        |
| Sleep talking                                   | -                                      | -         | 1 (0.19)  | -        |
| Suicidal ideation                               | 1 (0.05)                               | -         | -         | -        |
| Nervous system disorders                        | 94 (4.83)                              | 48 (6.83) | 39 (7.28) | 4 (6.35) |
| Disturbance in attention                        | 1 (0.05)                               | -         | -         | -        |
| Dizziness                                       | 20 (1.03)                              | 8 (1.14)  | 7 (1.31)  | -        |
| Dyslalia                                        | -                                      | 1 (0.14)  | -         | -        |
| Head discomfort                                 | 1 (0.05)                               | 1 (0.14)  | -         | -        |
| Headache                                        | 5 (0.26)                               | 5 (0.71)  | 2 (0.37)  | -        |
| Hypersomnia                                     | 2 (0.10)                               | 1 (0.14)  | 3 (0.56)  | -        |
| Paraesthesia                                    | -                                      | -         | 1 (0.19)  | -        |
| Sedation                                        | 2 (0.10)                               | -         | 2 (0.37)  | -        |
| Sleep paralysis                                 | 4 (0.21)                               | 1 (0.14)  | -         | -        |
| Sleep phase rhythm disturbance                  | -                                      | 1 (0.14)  | -         | -        |
| Somnolence                                      | 59 (3.03)                              | 33 (4.69) | 21 (3.92) | 4 (6.35) |
| Cognitive disorder                              | -                                      | -         | 1 (0.19)  | -        |
| Restless legs syndrome                          | -                                      | -         | 1 (0.19)  | -        |
| Poor quality sleep                              | 3 (0.15)                               | -         | 1 (0.19)  | -        |
| Angiopathy                                      | 2 (0.10)                               | -         | -         | -        |
| Hot flush                                       | 2 (0.10)                               | -         | -         | -        |
| Respiratory, thoracic and mediastinal disorders | 1 (0.05)                               | 1 (0.14)  | 2 (0.37)  | -        |
| Cough                                           | -                                      | 1 (0.14)  | -         | -        |
| Dyspnoea                                        | -                                      | 1 (0.14)  | -         | -        |
| Pneumonia aspiration                            | -                                      | -         | 1 (0.19)  | -        |
| Rhinitis allergic                               | 1 (0.05)                               | -         | -         | -        |
| Sleep apnoea syndrome                           | -                                      | -         | 1 (0.19)  | -        |
| Gastrointestinal disorders                      | 4 (0.21)                               | 7 (1.00)  | 4 (0.75)  | -        |
| Abdominal discomfort                            | -                                      | -         | 1 (0.19)  | -        |

|                                                      |           |           |          |          |
|------------------------------------------------------|-----------|-----------|----------|----------|
| Diarrhea                                             | -         | 3 (0.43)  | -        | -        |
| Gastritis                                            | 1 (0.05)  | -         | -        | -        |
| Nausea                                               | 3 (0.15)  | 3 (0.43)  | 3 (0.56) | -        |
| Salivary hypersecretion                              | -         | 1 (0.14)  | -        | -        |
| Skin and subcutaneous tissue disorders               | 2 (0.10)  | 5 (0.71)  | 1 (0.19) | -        |
| Cold sweat                                           | -         | 1 (0.14)  | -        | -        |
| Drug eruption                                        | 1 (0.05)  | -         | -        | -        |
| Eczema                                               | -         | 1 (0.14)  | -        | -        |
| Hyperhidrosis                                        | 1 (0.05)  | -         | -        | -        |
| Night sweats                                         | -         | 1 (0.14)  | -        | -        |
| Pruritus                                             | -         | 2 (0.28)  | -        | -        |
| Rash                                                 | -         | 1 (0.14)  | 1 (0.19) | -        |
| Renal and urinary disorders                          | 1 (0.05)  | -         | -        | -        |
| Pollakiuria                                          | 1 (0.05)  | -         | -        | -        |
| General disorders and administration site conditions | 18 (0.92) | 17 (2.42) | 6 (1.12) | 1 (1.59) |
| Asthenia                                             | 1 (0.05)  | -         | -        | -        |
| Discomfort                                           | -         | 1 (0.14)  | -        | -        |
| Face edema                                           | 1 (0.05)  | -         | -        | -        |
| Feeling abnormal                                     | 6 (0.31)  | 4 (0.57)  | 1 (0.19) | -        |
| Feeling cold                                         | -         | -         | 1 (0.19) | -        |
| Hangover                                             | 5 (0.26)  | 2 (0.28)  | -        | -        |
| Malaise                                              | 6 (0.31)  | 7 (1.00)  | 3 (0.56) | 1 (1.59) |
| Edema peripheral                                     | -         | 2 (0.28)  | -        | -        |
| Thirst                                               | -         | 1 (0.14)  | 1 (0.19) | 1 (1.59) |
| Investigation                                        | -         | 1 (0.14)  | -        | -        |
| Blood glucose increased                              | -         | 1 (0.14)  | -        | -        |
| Injury, poisoning and procedural complications       | 2 (0.10)  | 1 (0.14)  | -        | -        |
| Fall                                                 | 2 (0.10)  | -         | -        | -        |
| Femoral neck fracture                                | 1 (0.05)  | -         | -        | -        |
| Subdural hematoma                                    | -         | 1 (0.14)  | -        | -        |
| Traumatic intracranial hemorrhage                    | -         | 1 (0.14)  | -        | -        |

MedDRA/J version(20.0)

## Supplement 2

## Accumulative continuation/discontinuation status by initial treatment status

|                     |                                        | Week 1<br>n (%) |        | Month 1<br>n (%) |        | Month 3<br>n (%) |        | Month 6<br>n (%) |        |
|---------------------|----------------------------------------|-----------------|--------|------------------|--------|------------------|--------|------------------|--------|
| Overall<br>(N=3248) | Continuing                             | 3026            | (93.2) | 2433             | (74.9) | 1870             | (57.6) | 1577             | (48.6) |
|                     | Completed treatment due to improvement | 22              | (0.7)  | 200              | (6.2)  | 415              | (12.8) | 555              | (17.1) |
|                     | Discontinued due to lack of efficacy   | 39              | (1.2)  | 110              | (3.4)  | 149              | (4.6)  | 159              | (4.9)  |
|                     | Discontinued due to inadequate effect  | 43              | (1.3)  | 187              | (5.8)  | 305              | (9.4)  | 354              | (10.9) |
|                     | Discontinued due to adverse event      | 84              | (2.6)  | 178              | (5.5)  | 236              | (7.3)  | 260              | (8.0)  |
|                     | Drop out due to no re-visits           | 22              | (0.7)  | 98               | (3.0)  | 194              | (6.0)  | 237              | (7.3)  |
|                     | Others                                 | 12              | (0.4)  | 42               | (1.3)  | 79               | (2.4)  | 106              | (3.3)  |
| Group N<br>(N=1946) | Continuing                             | 1821            | (93.6) | 1439             | (73.9) | 1067             | (54.8) | 893              | (45.9) |
|                     | Completed treatment due to improvement | 19              | (1.0)  | 171              | (8.8)  | 341              | (17.5) | 434              | (22.3) |
|                     | Discontinued due to lack of efficacy   | 23              | (1.2)  | 66               | (3.4)  | 87               | (4.5)  | 94               | (4.8)  |
|                     | Discontinued due to inadequate effect  | 20              | (1.0)  | 96               | (4.9)  | 163              | (8.4)  | 186              | (9.6)  |
|                     | Discontinued due to adverse event      | 37              | (1.9)  | 75               | (3.9)  | 103              | (5.3)  | 108              | (5.5)  |
|                     | Drop out due to no re-visits           | 21              | (1.1)  | 77               | (4.0)  | 134              | (6.9)  | 167              | (8.6)  |
|                     | Others                                 | 5               | (0.3)  | 22               | (1.1)  | 51               | (2.6)  | 64               | (3.3)  |
| Group S<br>(N=703)  | Continuing                             | 634             | (90.2) | 513              | (73.0) | 421              | (59.9) | 354              | (50.4) |
|                     | Completed treatment due to improvement | 2               | (0.3)  | 14               | (2.0)  | 34               | (4.8)  | 57               | (8.1)  |
|                     | Discontinued due to lack of efficacy   | 10              | (1.4)  | 23               | (3.3)  | 34               | (4.8)  | 36               | (5.1)  |
|                     | Discontinued due to inadequate effect  | 18              | (2.6)  | 60               | (8.5)  | 86               | (12.2) | 105              | (14.9) |
|                     | Discontinued due to adverse event      | 33              | (4.7)  | 70               | (10.0) | 83               | (11.8) | 93               | (13.2) |
|                     | Drop out due to no re-visits           | 0               | (0.0)  | 13               | (1.8)  | 32               | (4.6)  | 38               | (5.4)  |
|                     | Others                                 | 6               | (0.9)  | 10               | (1.4)  | 13               | (1.8)  | 20               | (2.8)  |
| Group A<br>(N=536)  | Continuing                             | 508             | (94.8) | 428              | (79.9) | 334              | (62.3) | 291              | (54.3) |
|                     | Completed treatment due to improvement | 1               | (0.2)  | 14               | (2.6)  | 38               | (7.1)  | 58               | (10.8) |
|                     | Discontinued due to lack of efficacy   | 6               | (1.1)  | 20               | (3.7)  | 27               | (5.0)  | 28               | (5.2)  |
|                     | Discontinued due to inadequate effect  | 5               | (0.9)  | 25               | (4.7)  | 50               | (9.3)  | 56               | (10.4) |
|                     | Discontinued due to adverse event      | 14              | (2.6)  | 33               | (6.2)  | 48               | (9.0)  | 55               | (10.3) |
|                     | Drop out due to no re-visits           | 1               | (0.2)  | 6                | (1.1)  | 24               | (4.5)  | 27               | (5.0)  |
|                     | Others                                 | 12              | (0.4)  | 42               | (1.3)  | 79               | (2.4)  | 106              | (3.3)  |

\*Group O was not analyzed because of the small number. "Overall" includes patients in Groups N, S, A, and O.

# Supplement 3

Concomitant sleep medication classes in Group A at the initiation of treatment with suvorexant

| Concomitant medications (hypnotics)                      |     |         |
|----------------------------------------------------------|-----|---------|
| Benzodiazepines                                          | 278 | (51.9%) |
| Z-drugs                                                  | 176 | (32.8%) |
| Benzodiazepines and Z-drugs                              | 39  | (7.3%)  |
| Melatonin receptor agonists                              | 32  | (6.0%)  |
| Benzodiazepines and melatonin receptor agonists          | 5   | (0.9%)  |
| Z-drugs and melatonin receptor agonists                  | 5   | (0.9%)  |
| Benzodiazepines, Z-drugs and melatonin receptor agonists | 1   | (0.2%)  |
| Total                                                    | 536 | 100.0%  |

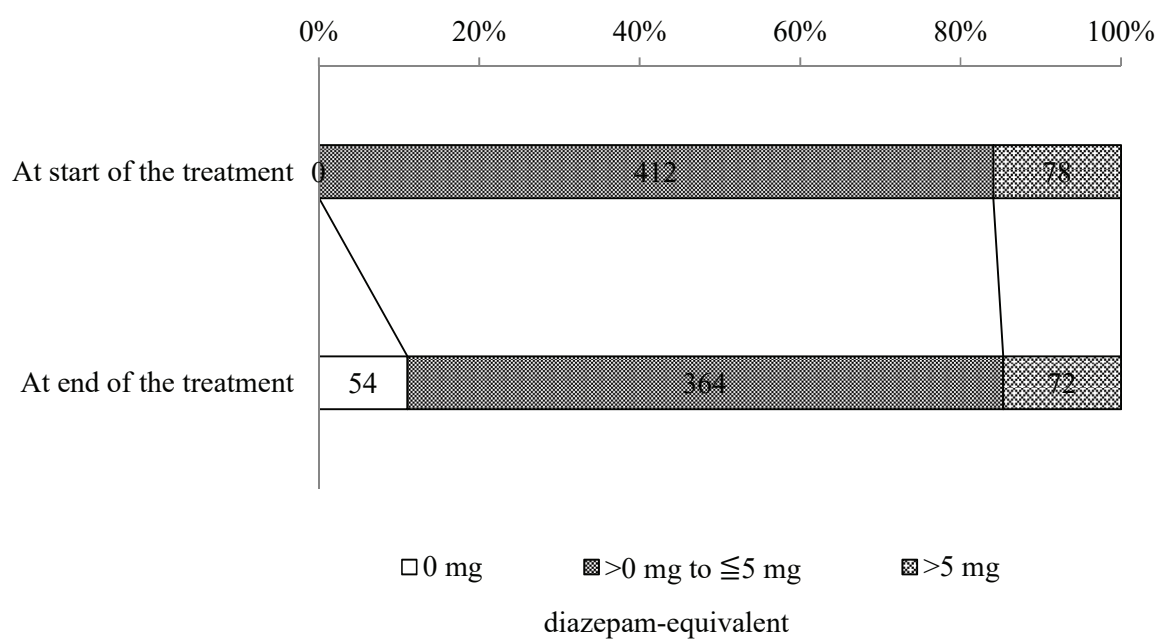

#### Supplement 4

Dosing conditions of concomitant benzodiazepine/non-benzodiazepine in Group A at the initiation of treatment with suvorexant and end of the PMS. The dosing of BzRAs was categorized into following three diazepam-equivalent dose groups. 1) 0 mg, 2) >0 mg to ≤5 mg, 3) >5 mg. Data labels indicate the number of patients.

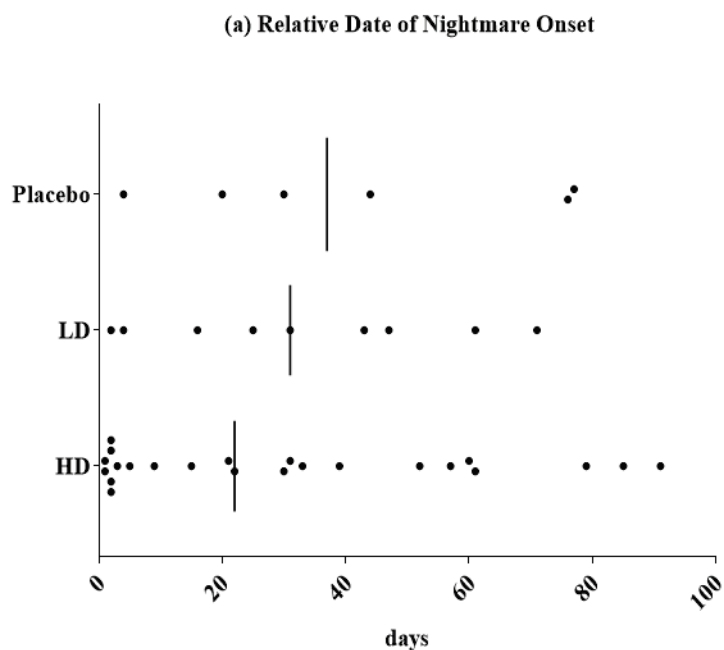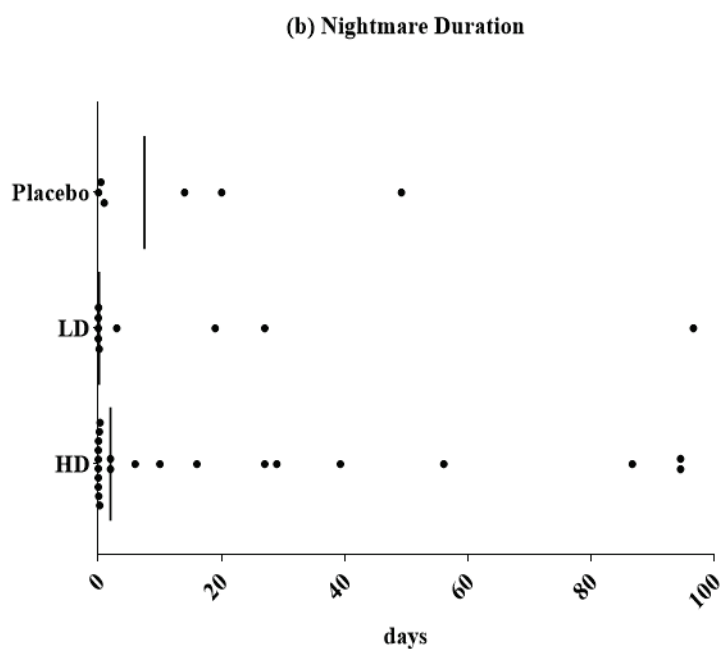

#### Supplement 5

Nightmare: relative date of the onset (a) and the duration (b) in combined phase 3 population 0-3 months (P028, P029, and P009). High dose (HD): suvorexant 40 mg for non-elderly (18 to <65 years) and 30 mg for elderly ( $\geq 65$  years); low dose (LD): suvorexant 20 mg for non-elderly and 15 mg for elderly. Dots indicate a nightmare event and the bars indicate the median. One patient who had not been recovered in HD is not shown in the graph (b).
